# Supplementary material for: Novel candidate theranostic radiopharmaceutical based on strontium hexaferrite nanoparticles conjugated with azacrown ligand
Source: Royal Society of Chemistry journal article supplement (doi:10.1039/d2dt03548k), 2023-01-01
Supplement: d2dt03548k1.pdf [file d2dt03548k1.pdf]

## **Novel candidate theranostic radiopharmaceutical based on strontium hexaferrite nanoparticles conjugated with azacrown ligand**

### **Supplementary Information**

*Sofia Khabirova, \*<sup>a</sup> Gleb Aleshin, \*<sup>a</sup> Evgeny Anokhin,<sup>a</sup> Anna Shchukina,<sup>b</sup> Anastasia Zubenko,<sup>b</sup> Olga Fedorova,<sup>b</sup> Aleksey Averin,<sup>c</sup> Lev Trusov,<sup>a</sup> Stepan Kalmykov<sup>a</sup>*

<sup>a</sup>Lomonosov Moscow State University, 119991 Leninskie Gory, 1/3, Moscow, Russian Federation.

<sup>b</sup>A. N. Nesmeyanov Institute of Organoelement Compounds of Russian Academy of Sciences, 119991 Vavilova, 28, GSP-1, Moscow, Russian Federation.

<sup>c</sup>Frumkin Institute of Physical chemistry and Electrochemistry Russian Academy of Sciences, Leninskiy ave. 31b4, Moscow, Russia.

Corresponding author; email address: [khabirovasophia@gmail.com](mailto:khabirovasophia@gmail.com) – Sofia Khabirova;  
[gleb.aleshin@gmail.com](mailto:gleb.aleshin@gmail.com) – Gleb Aleshin

Proton nuclear magnetic resonance ( $^1\text{H}$  NMR) spectra was recorded on a Bruker DRX-600 spectrometer and referenced to the residual solvent peak ( $\text{CDCl}_3$ ;  $\delta$  7.27).

Comparison of the NMR spectra of L2 and APTES-L2 (Fig. S1) shows that the signal of equivalent hydrogen atoms 1 and 1' located in the pyridine fragment is shifted to a stronger field during coordination of the APTES linker and the L2 ligand. This is due to the fact that the formed amide bond exhibits weaker acceptor properties than the carboxyl group. It has a strong influence on the group of protons 1 and 1', since it is in the  $\alpha$ -position. Based on the obtained NMR spectra data, it can be concluded that the APTES-L conjugate synthesis technique was selected correctly and used for further particle functionalization.

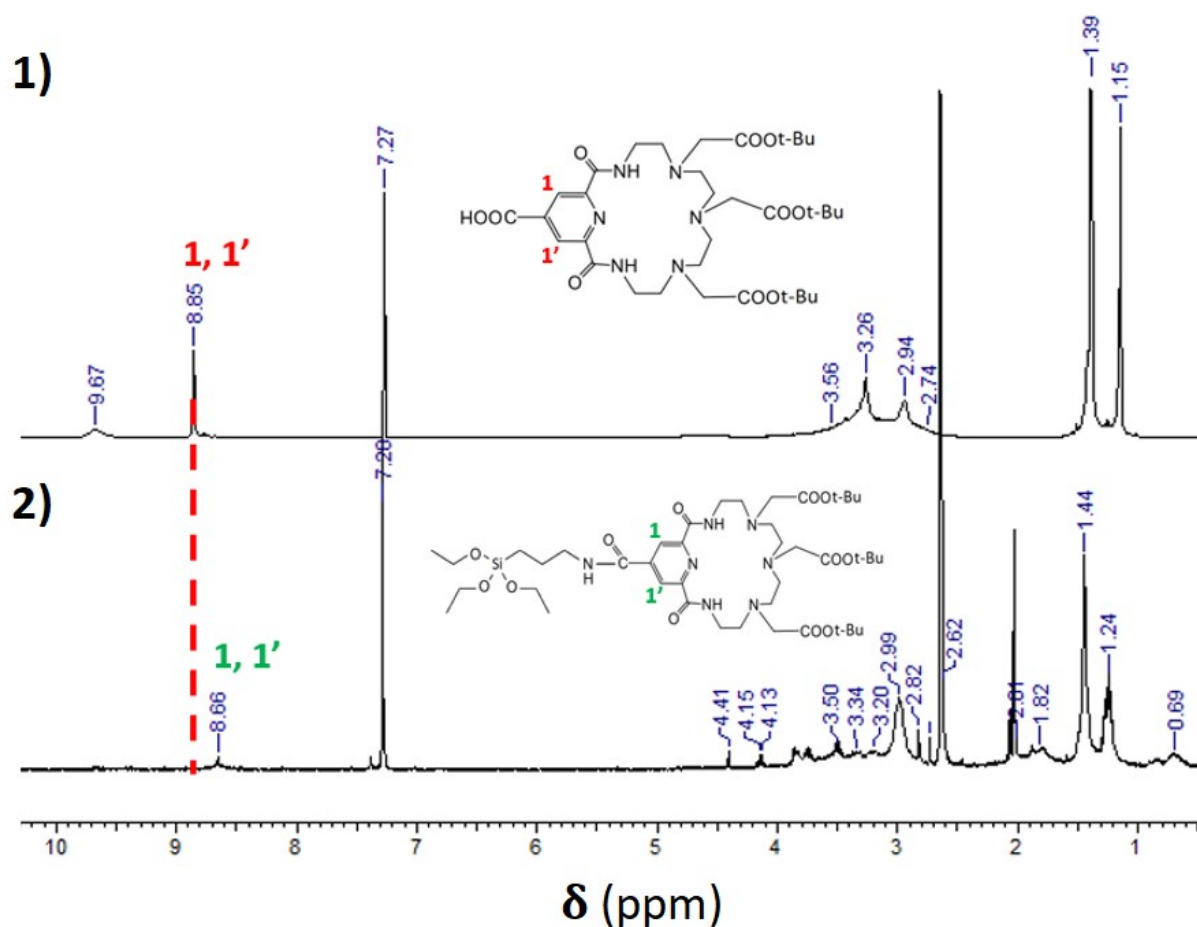

Fig. S1.  $^1\text{H}$ -NMR spectra of 1) L2 ligand and 2) APTES-L2 conjugate.
